# Supplementary material for: pH-responsive controlled release of antitumour-active polyoxometalate from mesoporous silica materials
Source: Royal Society of Chemistry journal article supplement (doi:10.1039/b901133a), 2009-01-01
Supplement: b901133a.pdf [file b901133a.pdf]

## ESI

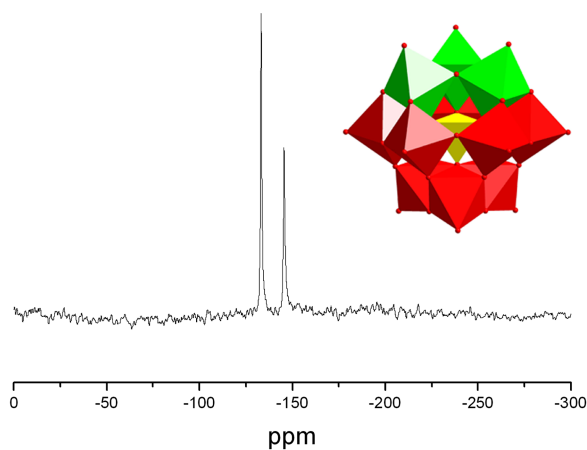

**Figure S1.**  $^{183}\text{W}$  NMR spectroscopy of  $\text{Ti}_3\text{SiW}_9$  in solution. The insert is polyhedral representation of the cluster structure. Yellow tetrahedron in the center represents  $\text{SiO}_4$ , while red octahedron and green octahedron stand for  $\text{WO}_6$  and  $\text{TiO}_6$ , respectively.

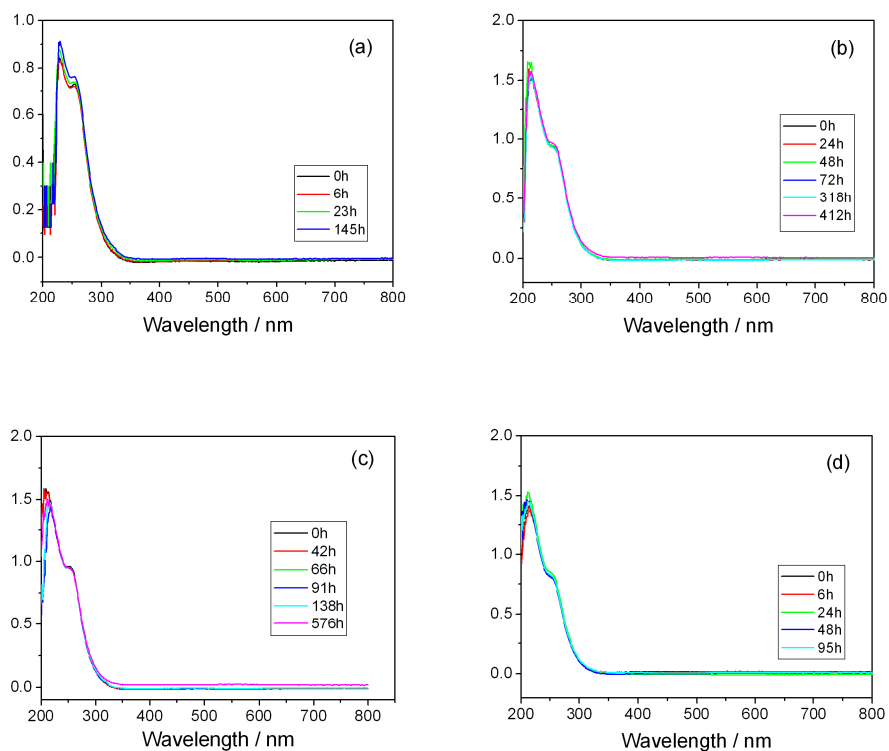

**Figure S2.** The stability of  $Ti_3SiW_9$  in different buffer solution was investigated by UV-vis spectroscopy: (a) 0.1 M HCl solution (pH 1.0), (b)  $NaH_2PO_4 - Na_2HPO_4$  buffer solution (pH 7.0), (c) boric acid - borate buffer solution (pH 8.0), and (d) boric acid - NaOH buffer solution (pH 9.3).

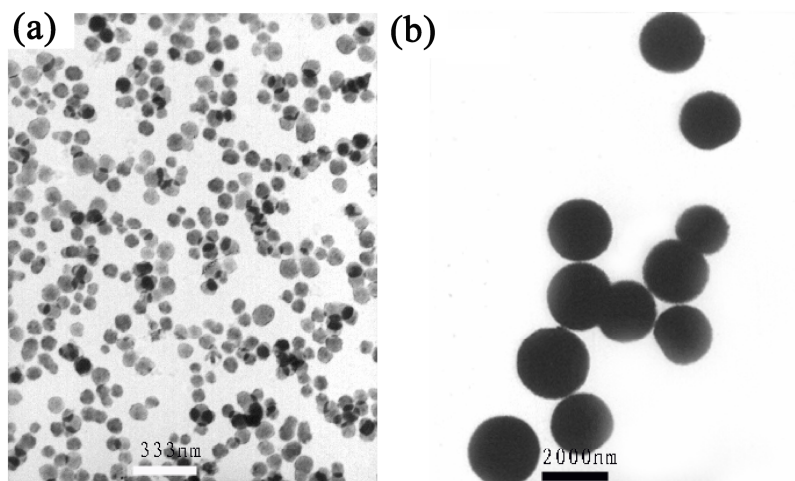

**Figure S3.** TEM images of (a) MMSN-NH<sub>2</sub>, and (b) BMSM-NH<sub>2</sub>.

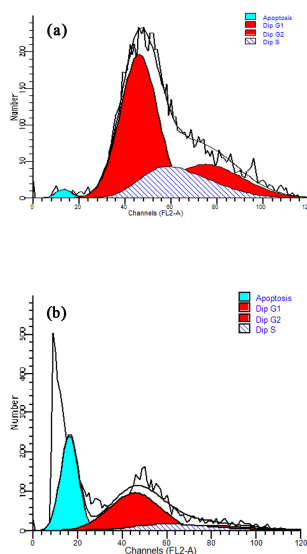

**Figure S4.** Effect of Ti<sub>3</sub>SiW<sub>9</sub> on the cell cycle progression. Ls-174-T cells were cultured with or without 0.8 mg mL<sup>-1</sup> Ti<sub>3</sub>SiW<sub>9</sub> for 24 h, fixed and stained with PI, then the DNA content was analyzed by flow cytometry. The blue peaks in the histograms are sub-G1 peak, representing the percentage of the apoptotic cells.

### **Effect of $\text{Ti}_3\text{SiW}_9$ on Cell Cycle Progression**

To examine the mechanism responsible for  $\text{Ti}_3\text{SiW}_9$ -induced inhibition of tumor cell proliferation, we investigated the cell cycle by flow cytometry. The cell cycle phase distribution of the whole population of  $\text{Ti}_3\text{SiW}_9$ -treated colon carcinomas cells exhibited significantly changes compared with the control as shown in Figure 6. A sub-G1 (sub-2N) DNA peak appeared, which has been suggested to be the apoptotic DNA.<sup>1</sup> The percentage of apoptotic Ls-174-T cells after incubation for 24 h was 36.45%. Ls-174-T cells growing in the absence of  $\text{Ti}_3\text{SiW}_9$  had the following distribution in cell cycle: 53.76 % in G0/G1 phase, 21.40% in S phase, and 24.85 % in G2/M phase. Upon the presence of  $\text{Ti}_3\text{SiW}_9$ , the percentage of cells in G0/G1 phase increase to 65.09%, and the cells in the S phase decrease to 16.98%. These results demonstrated that  $\text{Ti}_3\text{SiW}_9$ -treated Ls-174-T cells accumulated at the G0/G1 phase of the cell cycle and underwent apoptotic cell death.

**Table S1**

| Sample               | N    | C    | H    |
|----------------------|------|------|------|
| MMSN-NH <sub>2</sub> | 2.38 | 9.26 | 2.58 |
| BMSM-NH <sub>2</sub> | 1.64 | 5.95 | 1.59 |

**Table S2.** Growth Inhibitory Effect of  $\text{Ti}_3\text{SiW}_9$  on Human Tumor Cells.

| Concentration<br>of $\text{Ti}_3\text{SiW}_9$<br>( $\text{mg mL}^{-1}$ ) | FL                        | Ls-174-T                 |                                             | Hela                     |                                             | Bel-7402                 |                                             | A-549                    |                                             |
|--------------------------------------------------------------------------|---------------------------|--------------------------|---------------------------------------------|--------------------------|---------------------------------------------|--------------------------|---------------------------------------------|--------------------------|---------------------------------------------|
|                                                                          | Survival<br>percentage(%) | Inhibitory<br>effect (%) | $\text{IC}_{50}$<br>( $\text{mg mL}^{-1}$ ) |
| control                                                                  | 100                       | 0                        |                                             | 0                        |                                             | 0                        |                                             | 0                        |                                             |
| 1.25                                                                     | 89.6                      | 47.5                     |                                             | 52.3                     |                                             | 52.0                     |                                             | 35.4                     |                                             |
| 0.625                                                                    | 100                       | 35.6                     | 1.59                                        | 48.4                     | 0.75                                        | 46.8                     | 1.19                                        | 29.6                     | 10.5                                        |
| 0.312                                                                    | 100                       | 33.5                     |                                             | 37.9                     |                                             | 31.9                     |                                             | 24.6                     |                                             |
| 0.156                                                                    | 100                       | 25.9                     |                                             | 31.0                     |                                             | 27.9                     |                                             | 25.5                     |                                             |
| 0.078                                                                    | 100                       | 24.4                     |                                             | 28.5                     |                                             | 24.1                     |                                             | 27.2                     |                                             |
| 0.039                                                                    | 100                       | 17.1                     |                                             | 24.9                     |                                             | 20.1                     |                                             | 23.9                     |                                             |
| 0.020                                                                    | 100                       | 9.8                      |                                             | 10.8                     |                                             | 17.9                     |                                             | 7.5                      |                                             |

1 C. N. Chen, C. L. Wu, H. S. Shy, J. K. Lin, *J. Nat. Prod.*, 2003, **66**, 503.
